# Supplementary material for: TAp63 contributes to sexual dimorphism in POMC neuron functions and energy homeostasis
Source: Nat Commun. 2018 Apr 18;9:1544. doi: 10.1038/s41467-018-03796-7 (PMC5906443; doi:10.1038/s41467-018-03796-7)
Supplement: Supplementary file 1 — Supplementary Information [file 41467_2018_3796_MOESM1_ESM.pdf]

**TAp63 contributes to sexual dimorphism in POMC neuron functions and energy  
homeostasis**

Chunmei Wang<sup>1,6</sup>, Yanlin He<sup>1,6</sup>, Pingwen Xu<sup>1,6</sup>, Yongjie Yang<sup>1</sup>, Kenji Saito<sup>1</sup>, Yan Xia<sup>1</sup>,  
Xiaofeng Yan<sup>1</sup>, Antentor Hinton Jr.<sup>1</sup>, Chunling Yan<sup>1</sup>, Hongfang Ding<sup>1</sup>, Likai Yu<sup>1</sup>, Gang Shu<sup>1</sup>,  
Rajat Gupta<sup>2</sup>, Qi Wu<sup>1</sup>, Qingchun Tong<sup>4</sup>, William R. Lagor<sup>2</sup>, Elsa R. Flores<sup>5</sup> and Yong Xu<sup>1,3</sup>

**Inventory**

**Supplementary Figure 1-8**

Supplementary Figure 1 (related to Figure 1). Neural activities in other body weight-regulatory  
neural populations.

Supplementary Figure 2 (related to Figure 2). Effects of TAp63 on POMC expression.

Supplementary Figure 3 (related to Figure 3). Validation of pomc-TAp63 KO mice.

Supplementary Figure 4 (related to Figure 3). Estrous cycles in tamoxifen-injected female mice.

Supplementary Figure 5 (related to Figure 3). Food intake in chow-fed mice.

Supplementary Figure 6 (related to Figure 3). CLAMS study in female mice.

Supplementary Figure 7 (related to Figure 5). Effects of TAp63 overexpression.

Supplementary Figure 8 (related to Figure 6). mEPSC in male and female POMC neurons.

**Supplemental Table 1. Primer sequences.**

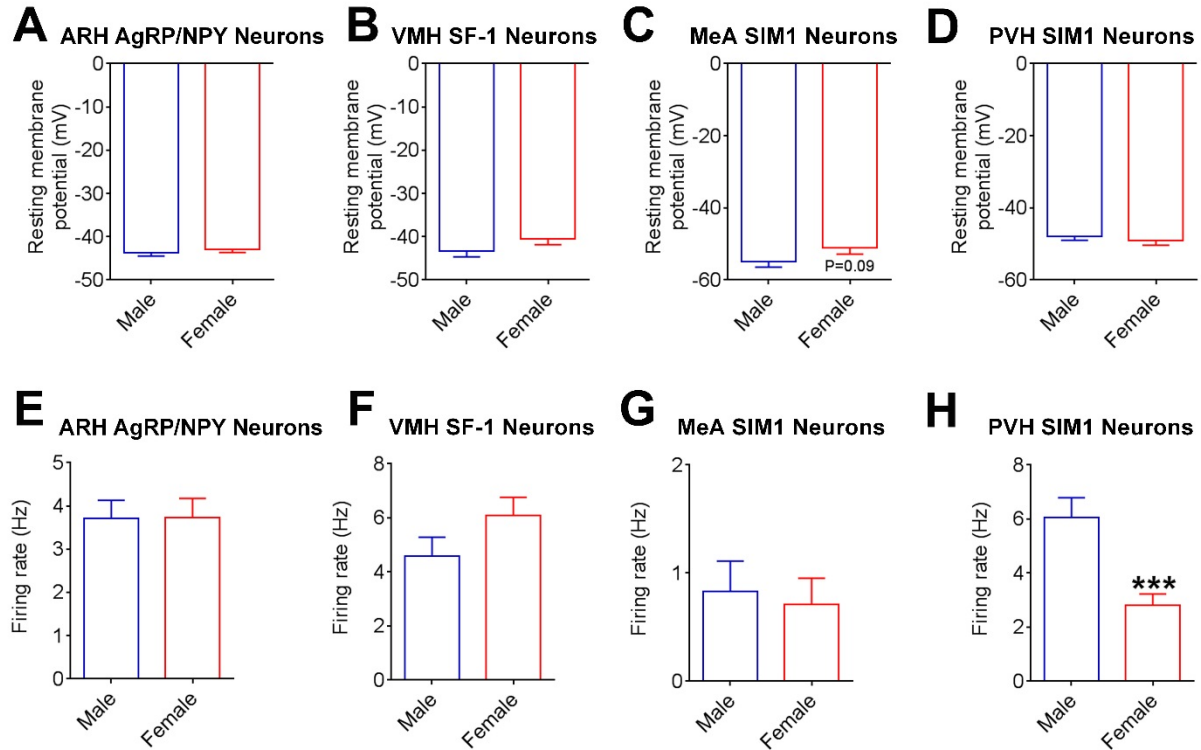

**Supplementary Figure 1 (related to Figure 1). Neural activities in other body weight-regulatory neural populations.** (A and E) Average resting membrane potential (A) and firing rate (E) in ARH AgRP/NPY neurons from male or female *NPY-EGFP* mice. Data are presented as mean±SEM. N=19 or 24 per group. (B and F) Average resting membrane potential (B) and firing rate (F) in VMH SF1 neurons from male or female *SF1-Cre/Rosa26-tdTOMATO* mice. Data are presented as mean±SEM. N=12 or 26 per group. (C and G) Average resting membrane potential (C) and firing rate (G) in MeA SIM1 neurons from male or female *SIMI-Cre/Rosa26-tdTOMATO* mice. Data are presented as mean±SEM. N=8 or 9 per group. (D and H) Average resting membrane potential (D) and firing rate (H) in PVH SIM1 neurons from male or female *SIMI-Cre/Rosa26-tdTOMATO* mice. Data are presented as mean±SEM. N=15 per group. \*\*\* P<0.001 in t-tests.

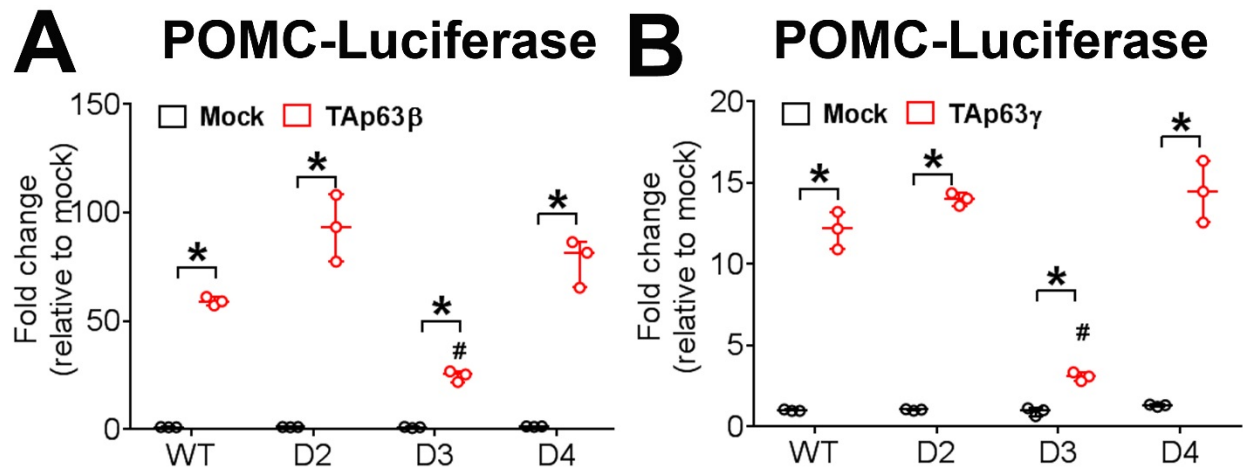

**Supplementary Figure 2 (related to Figure 2). Effects of TAp63 on POMC expression.**

Effects of TAp63 $\beta$  (A) and TAp63 $\gamma$  (B) on POMC-luciferase activity in N46 cells. WT, pGL3b-POMC promoter; D2-4, pGL3b-POMC promoter with the deletion of site 2, 3 or 4. Data are presented as box and whiskers showing minimal, maximal and median values with individual data points. N=3. \* P<0.05 vs. mock in the same POMC promoter; # P<0.05 vs WT POMC promoter in response to the same TAp63 overexpression in 2-way ANOVA analysis followed by post hoc Sidak tests.

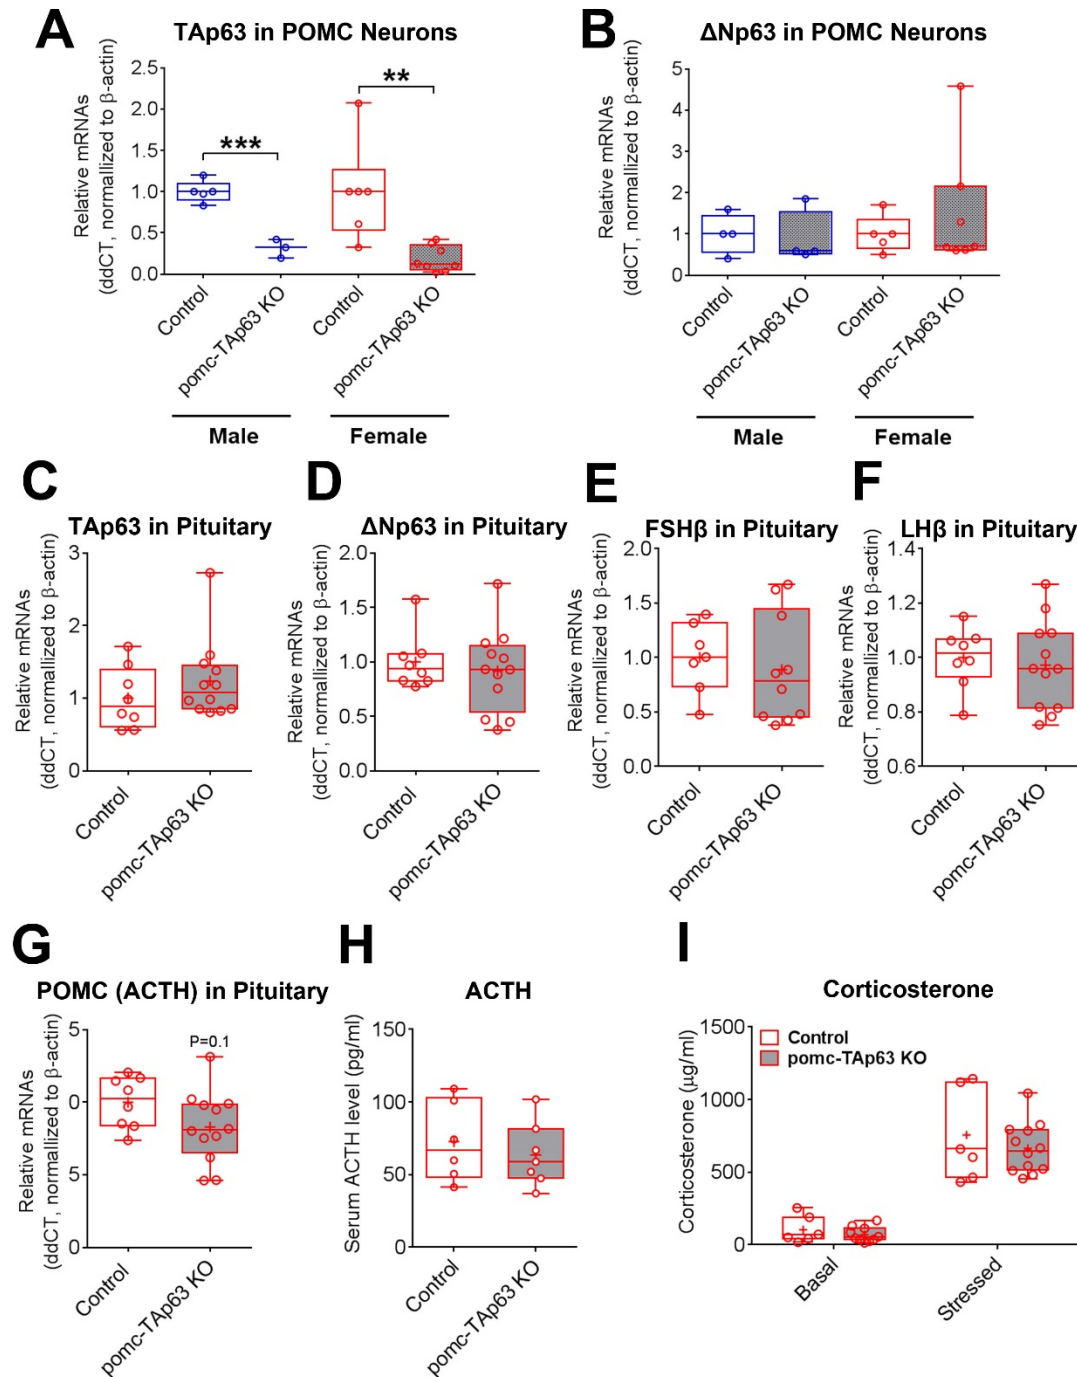

**Supplementary Figure 3 (related to Figure 3). Validation of pomc-TAp63 KO mice. (A-B)**

RiboTag quantification of mRNAs of TAp63 (A) and  $\Delta$ Np63 (B) in POMC neurons from HFD-fed male or female control (*RiboTag/TAp63<sup>fl/+</sup>/POMC-CreER<sup>T2</sup>*) or from pomc-TAp63 KO (*RiboTag/TAp63<sup>fl/fl</sup>/POMC-CreER<sup>T2</sup>*) mice at the age of 16 weeks of age. Data are presented as

48 mean $\pm$ SEM with individual data points. N=3-8 per group. \*\* P<0.01 and \*\*\* P<0.001 in t-tests.  
49 (C-G) Regular real-time RT-PCR quantification of TAp63 (C),  $\Delta$ Np63 (D), FSH  $\beta$  subunit (E),  
50 LH  $\beta$  subunit (F) and POMC/ACTH (G) mRNAs in the homogenized pituitaries of control or  
51 pomc-TAp63 KO female mice. Data are presented as box and whiskers showing minimal,  
52 maximal and median values with individual data points. N=8 or 12 per group. (H) Serum ACTH  
53 levels in control or pomc-TAp63 KO female mice. Data are presented as box and whiskers  
54 showing minimal, maximal and median values with individual data points. N=6 or 7 per group.  
55 (I) Serum corticosterone levels in control or pomc-TAp63 KO female mice at the basal condition  
56 or at stressed condition (30 min restraint). Data are presented as box and whiskers showing  
57 minimal, maximal and median values with individual data points. N=7-12 per group.  
58

## Female #1

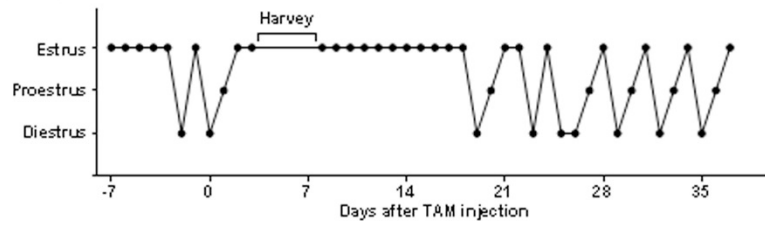

## Female #2

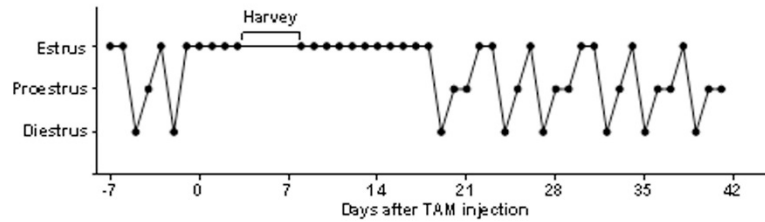

## Female #3

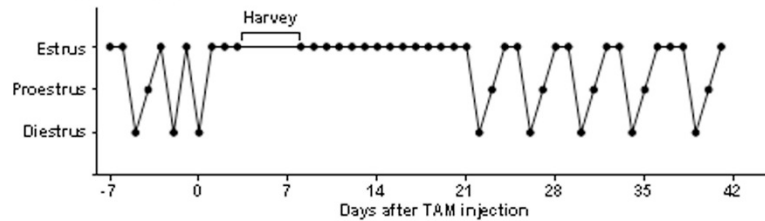

59

60 **Supplementary Figure 4 (related to Figure 3). Estrous cycles in tamoxifen-injected female**

61 **mice.** Estrous stages of 3 female wild-type mice before and after they received tamoxifen

62 injections ( $0.2 \text{ g kg}^{-1}$ , i.p.) at 11 weeks of age. Note that 5-day data were missing due to the

63 closure of the BCM animal facility during Hurricane Harvey.

64

65

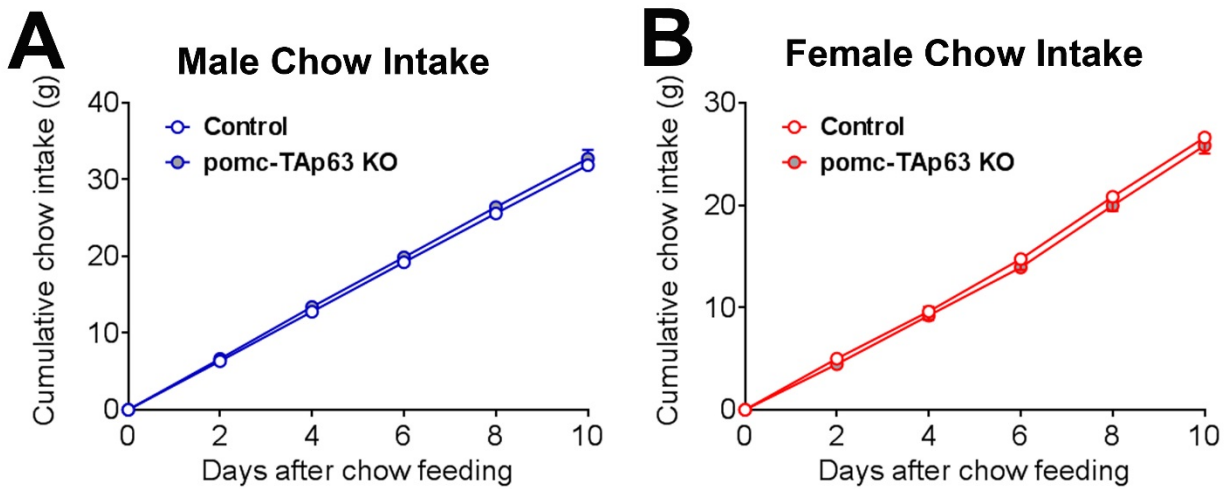

67

68 **Supplementary Figure 5 (related to Figure 3). Food intake in chow-fed mice. (A)**

69 Cumulative chow intake in male mice. Data are presented as mean±SEM. N=5 or 9 per group.

70 (B) Cumulative chow intake in female mice. Data are presented as mean±SEM. N=8 or 10 per

71 group.

72

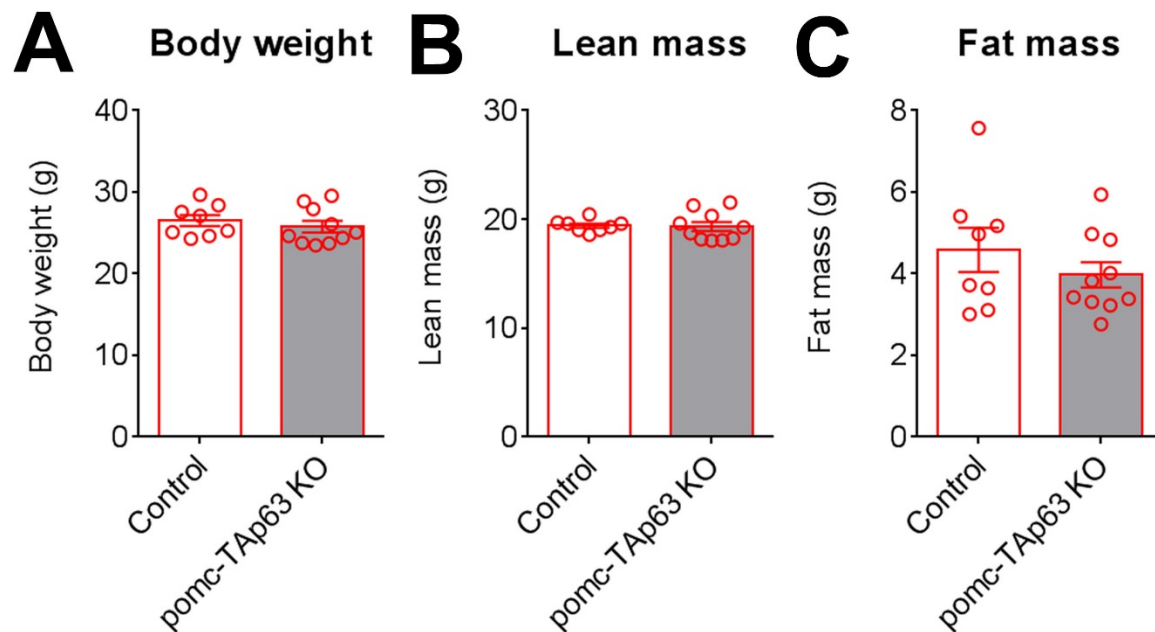

**Supplementary Figure 6 (related to Figure 3). CLAMS study in female mice.** Female control and pomc-TAp63 KO littermates (30 weeks of age) were adapted into the CLAMS metabolic cages and subjected to a 3-day-chow-3-day-HFD feeding protocol. (A-C) Body weight (A), lean mass (B) and fat mass (C) of mice when they entered the CLAMS. Data are presented as mean $\pm$ SEM with individual data points. N=8 or 10 per group.

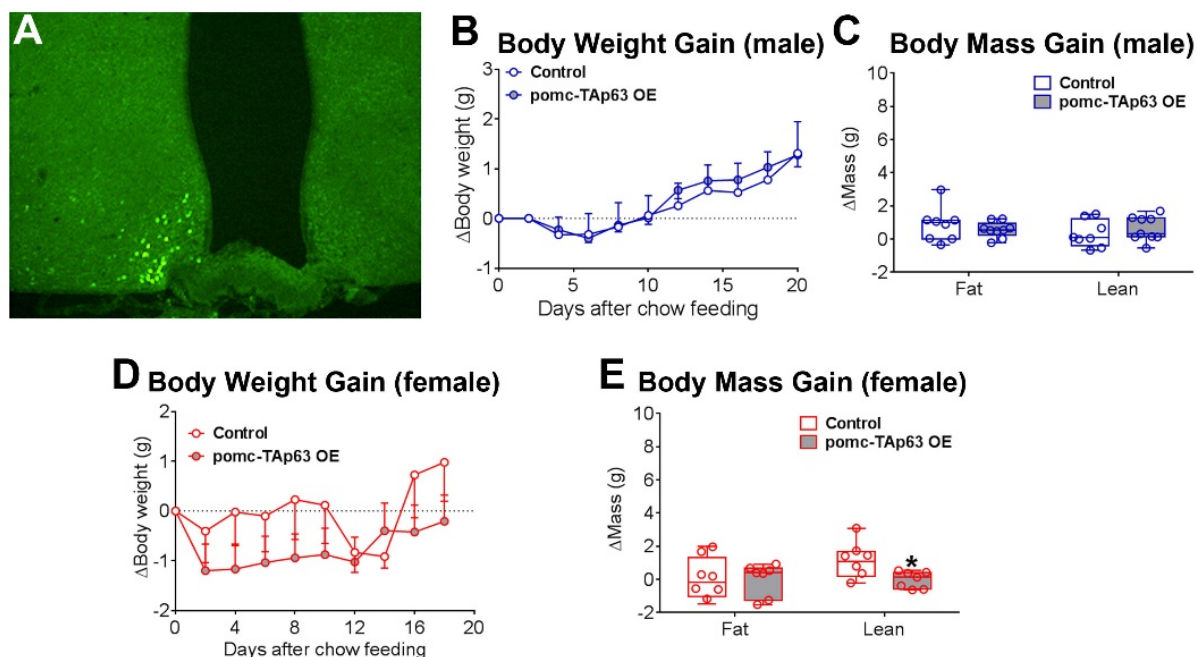

**Supplementary Figure 7 (related to Figure 5). Effects of TAp63 overexpression.** (A) A representative immunofluorescent image showing GFP only targeting one side of the ARH in POMC-Cre mice receiving AAV-FLEX-TAp63-2A-GFP stereotaxic injections. (B) Changes in body weight in chow-fed male control mice or mice with TAp63 overexpressed in POMC neurons. Data are presented as mean $\pm$ SEM. N=8 or 9 in control or OE group. (C) Changes in fat and lean mass in male mice. Data are presented as box and whiskers showing minimal, maximal and median values with individual data points. N=8 or 9 per group. (D) Changes in body weight in chow-fed female control mice or mice with TAp63 overexpressed in POMC neurons. Data are presented as mean $\pm$ SEM. N=7 in control or OE group. (E) Changes in fat and lean mass in male mice. Data are presented as box and whiskers showing minimal, maximal and median values with individual data points. N=7 per group. \* P<0.05 between the two genotypes in t-tests.

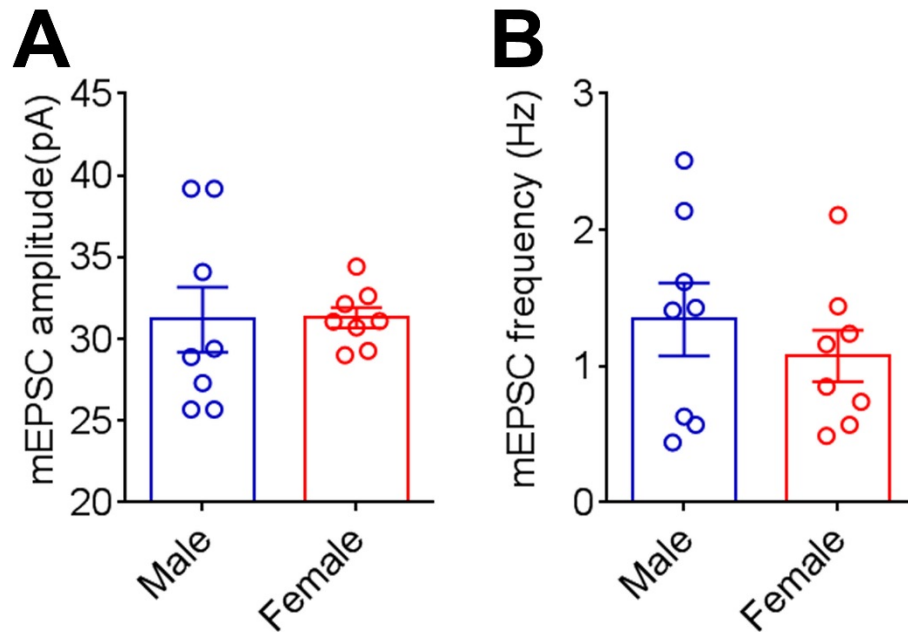

**Supplementary Figure 8 (related to Figure 6). mEPSC in male and female POMC neurons.**

(A-B) Amplitude (A) and frequency (B) of mEPSC in POMC neurons from male vs. female

*POMC-CreER<sup>T2</sup>/Rosa26-tdTOMATO* mice with tamoxifen induction at 11 weeks of age

followed by 4-week HFD feeding. Data are presented as mean±SEM with individual data point.

N=8 per group.

100 **Supplemental Table 1. Primer sequences.**

| Primer ID      | Primer Sequence                    | Purpose                                                 |
|----------------|------------------------------------|---------------------------------------------------------|
| TAp63-fl F     | CCACATAGCCATATCTGCC                | Detecting the TAp63 <sup>fl/fl</sup> allele             |
| TAp63-fl R     | TCGCCATAACTTCGTATAGC               |                                                         |
| TAp63-KO F     | CCTCACATCTGTCTCCTGACC              | Detecting the recombined TAp63 <sup>fl/fl</sup> alleles |
| TAp63-KO R     | TTTTCGGAAGGTTTCATCCAC              |                                                         |
| POMC F         | GAGGCCACTGAACATCTTTGTC             | Detecting POMC mRNAs                                    |
| POMC R         | GCAGAGGCAAACAAGATTGG               |                                                         |
| TAp63 F        | CCCAGAGGTCTTCCAGCATA               | Detecting TAp63 mRNAs                                   |
| TAp63 R        | TGCGGATACAATCCATGCTA               |                                                         |
| Delta Np63 QF  | AGGCTCTCAGAGGGGGTGGG               | Detecting ΔNp63 mRNAs                                   |
| Delta Np63 QR  | ATTGAGTCTGGGCATTGTTTTCC            |                                                         |
| FSHb-QF        | TTCTGGTGCTGGAGAGCAAT               | Detecting FSH β mRNAs                                   |
| FSHb-QR        | GCCGAGCTGGGTCTTATAC                |                                                         |
| LHb-QF         | CTGAGCCCAAGTGTTGGTGTG              | Detecting LH β mRNAs                                    |
| LHb-QR         | GACCATGCTAGGACAGTAGCC              |                                                         |
| b-actin F      | ATGGAGGGGAATACAGCCC                | Detecting β-actin mRNAs                                 |
| b-actin R      | TTCTTTGCAGCTCCTTCGTT               |                                                         |
| POMC-luc-F     | AAAACGCGTTTAAAAACAAAAGGCCCCAGAAG   | Constructing POMC promoter                              |
| POMC-luc-R     | TTTCTCGAG TTATCACAATGCAACCACCCCAGA |                                                         |
| POMC D1F 2918  | CCTGCTCCAGGCTATCAAAG               | Detecting TAp63 binding on site 1                       |
| POMC D1R 3054  | CCAGATCAGAATCAGGGTCAA              |                                                         |
| POMC D2F 3030  | GCCTTTGACCCTGATTCTGA               | Detecting TAp63 binding on site 2                       |
| POMC D2R 3228  | AGTGCACTGGCTGTTCTTCC               |                                                         |
| POMC D3 F 4053 | AGCGTCTAACTGGGGAGTGA               | Detecting TAp63 binding on site 3                       |
| POMC D3 R 4198 | CTGCAGTGGCATCTACCTGA               |                                                         |
| POMC D4 F 4807 | TCAGCGGGTCTGTGCTAAC                | Detecting TAp63 binding on site 4                       |
| POMC D4 R 4998 | TCCCTGTCGCTCTTCTCTCT               |                                                         |

|                |                                                  |                                              |
|----------------|--------------------------------------------------|----------------------------------------------|
| POMC D5 F 5398 | TTCTCCTTCCGATTGTTTGG                             | Detecting TAp63 binding on site 5            |
| POMC D5 R 5565 | TCTGCTAAGATGCGCAGAGA                             |                                              |
| TAp63b virus F | ATTGCTAGCATGTCGCAGAGCACCCA                       | Constructing AAV-EF1-FLEX-TAp63-2A-GFP virus |
| TAp63b virus R | AAGACCGGT GACTTGCCAAATCCTGACAAT                  |                                              |
| POMC-63-S1D-F  | CTTTTTCCTGGTGACATCCTGGTAACAGGATATCC<br>TGT       | Constructing POMC-luc with site 1 deletion   |
| POMC-63-S1D-R  | ACAGGATATCCTGTTACCAGGATGTCACCAGGAA<br>AAAG       |                                              |
| POMC-63-S2D-F  | GAGCTGGAGTTTATAGACAGACGTGTTGAGAATT<br>GAACCC     | Constructing POMC-luc with site 2 deletion   |
| POMC-63-S2D-R  | GGGTTCAATTCTCAACACGTCTGTCTATAAACTCC<br>AGCTC     |                                              |
| POMC-63-S3D-F  | CCGACTGGTCTGGGCCAGCCACAGCT                       | Constructing POMC-luc with site 3 deletion   |
| POMC-63-S3D-R  | AGCTGTGGCTGGCCCAGACCAGTCGG                       |                                              |
| POMC-63-S4D-F  | CGCGCTTTCAGGGCTCAGCCAGGAC                        | Constructing POMC-luc with site 4 deletion   |
| POMC-63-S4D-R  | GTCTGGCTGAGCCCTGGAAAGCGCG                        |                                              |
| POMC-63-S5D-F  | GACTTGTATATCTTCTTTAAGGTTGGAAAGATAGC<br>GGGAGAGAA | Constructing POMC-luc with site 5 deletion   |
| POMC-63-S5D-R  | TTCTCTCCCGCTATCTTTCCAACCTTAAAGAAGAT<br>ATACAAGTC |                                              |
